# Supplementary material for: An Exploration of Dynamic Changes in the Mulberry Growth Process Based on UPLC-Q-Orbitrap-MS, HS-SPME-GC-MS, and HS-GC-IMS
Source: MDPI journal article supplement (doi:10.3390/foods12183335), 2023-09-06
Supplement: s1 [file s1]

## Supplementary materials

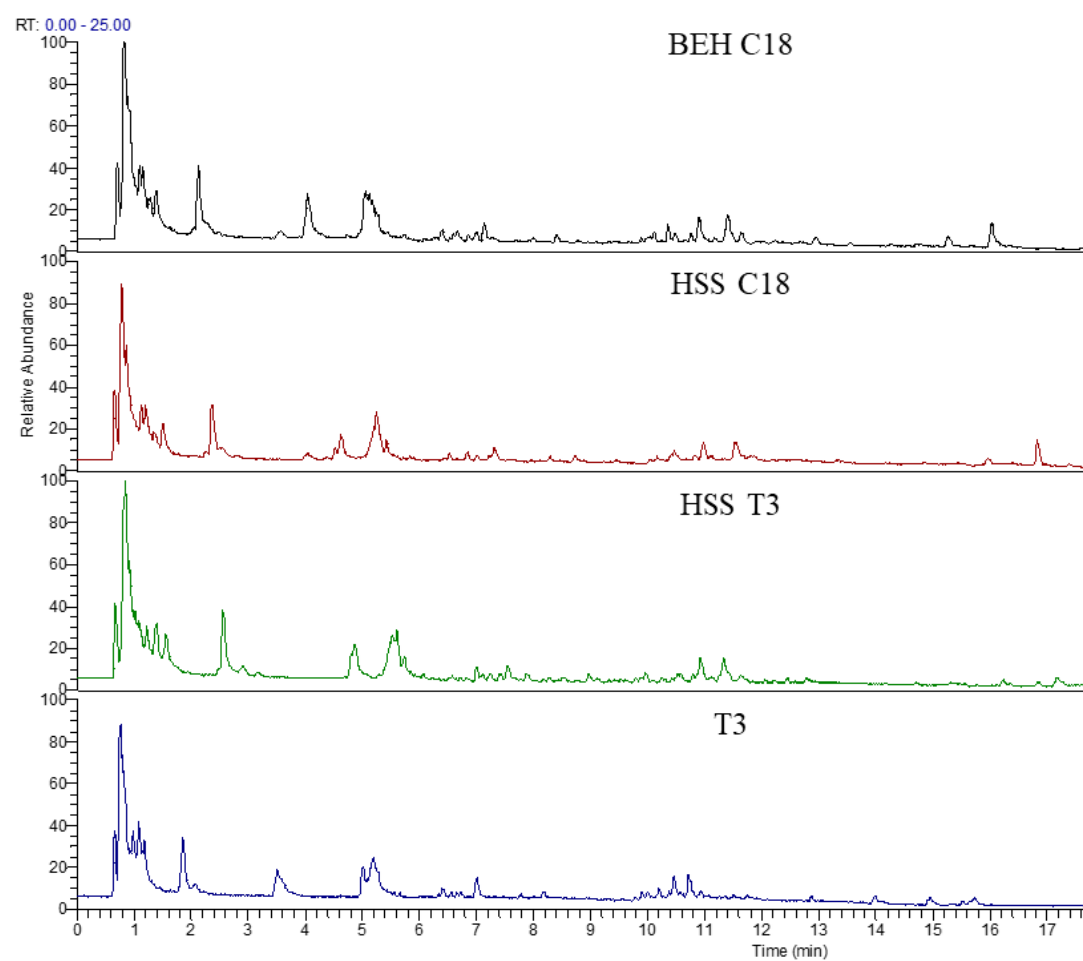

Figure S1. TIC of different chromatographic columns

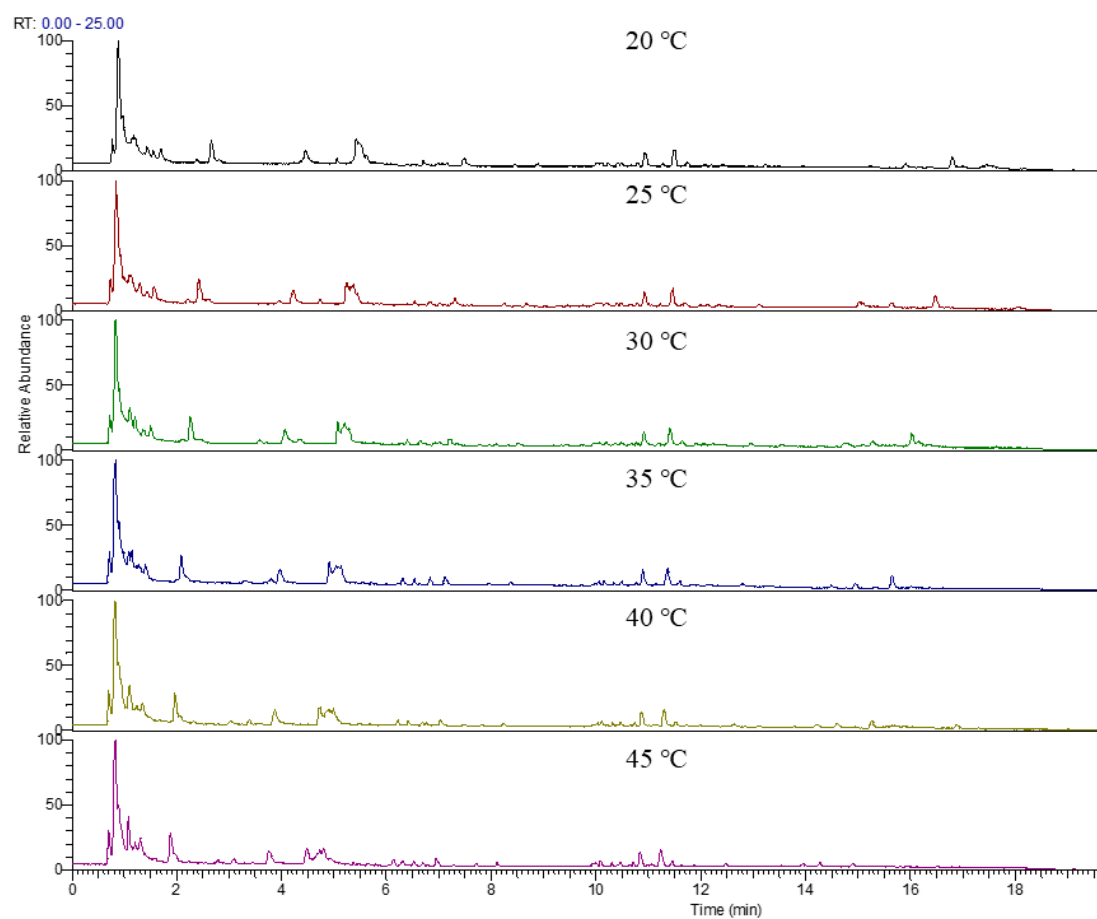

Figure S2. TIC of different column temperatures

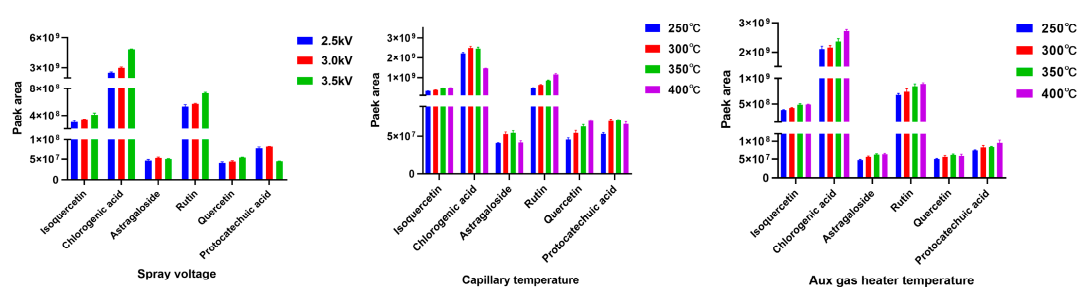

Figure S3. Optimization of Q-Orbitrap-MS conditions

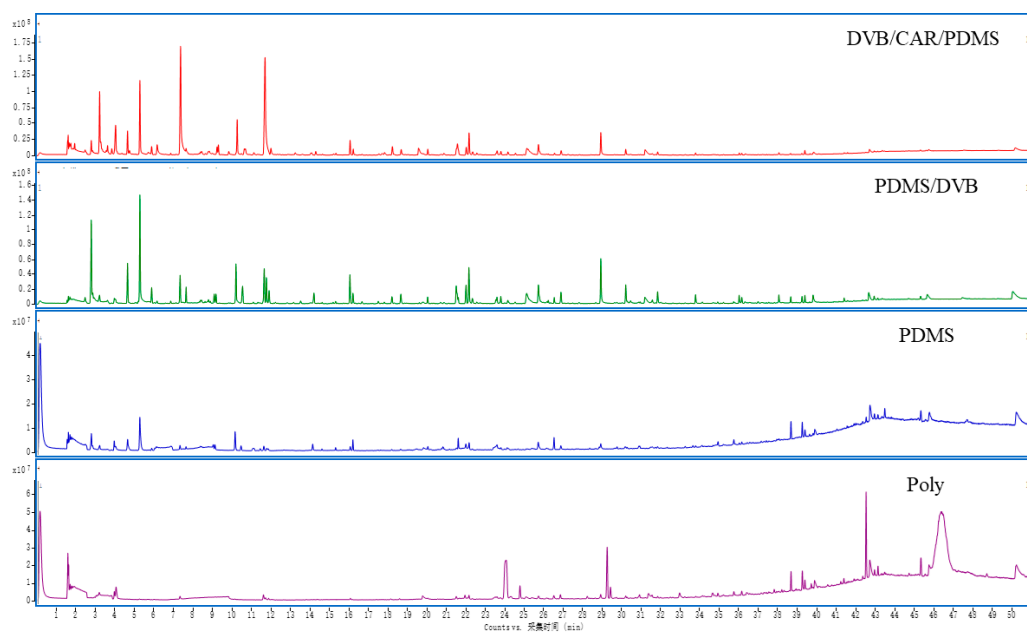

Figure S4. Optimization of extraction fiber head

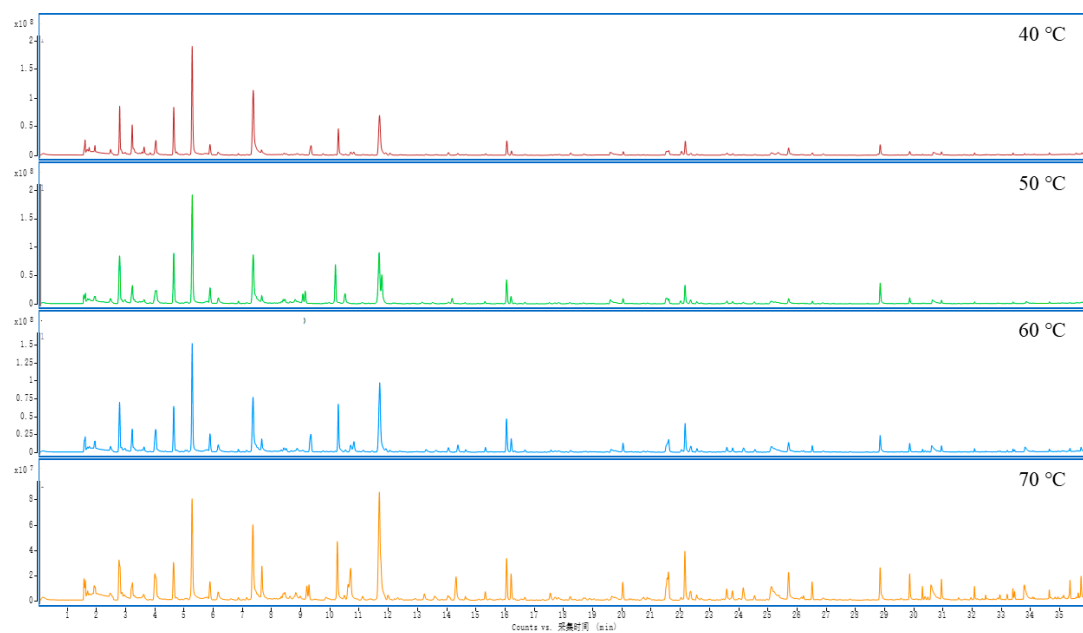

Figure S5. Optimization of incubation temperature

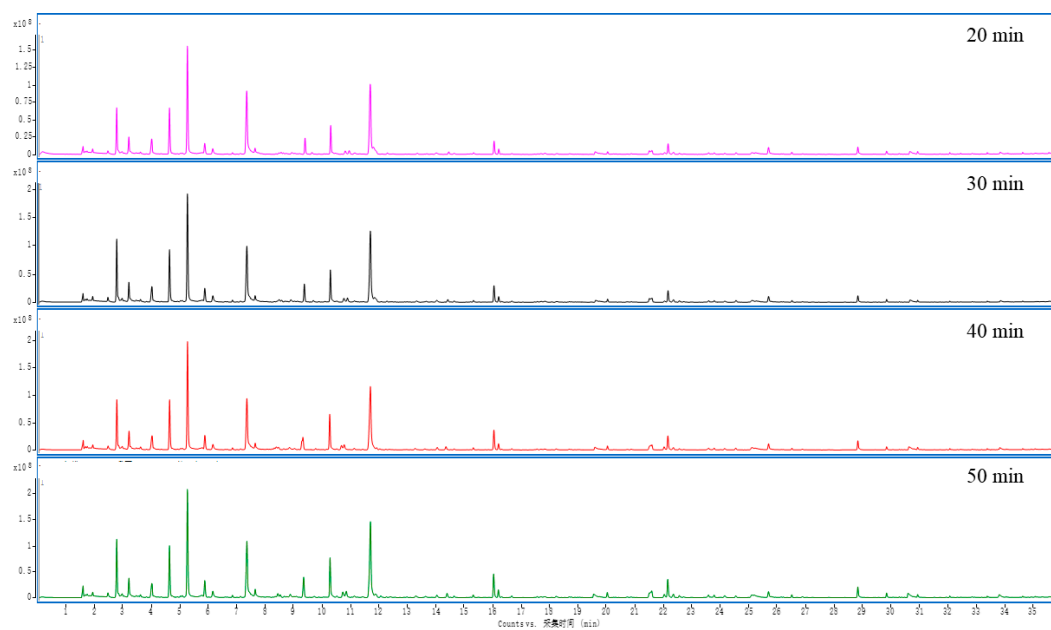

Figure S6. Optimization of extraction time

Table S1 results of absorbance and DPPH radical clearance rate

| Stage     | Concentration<br>(mg/mL) | A <sub>1-1</sub> | A <sub>1-2</sub> | A <sub>1-3</sub> | A <sub>2-1</sub> | A <sub>2-2</sub> | A <sub>2-3</sub> | A <sub>3-1</sub> | A <sub>3-2</sub> | A <sub>3-3</sub> | R1<br>(%) | R2<br>(%) | R3<br>(%) |
|-----------|--------------------------|------------------|------------------|------------------|------------------|------------------|------------------|------------------|------------------|------------------|-----------|-----------|-----------|
| Stage I   | 0.1                      | 0.835            | 0.847            | 0.835            | 0.001            | 0.001            | 0.001            |                  |                  |                  | 19.96     | 23.97     | 24.52     |
|           | 0.2                      | 0.738            | 0.747            | 0.734            | 0.001            | 0.001            | 0.001            |                  |                  |                  | 29.27     | 32.82     | 33.67     |
|           | 0.4                      | 0.577            | 0.551            | 0.557            | 0.001            | 0.002            | 0.001            |                  |                  |                  | 44.72     | 47.58     | 49.68     |
|           | 0.6                      | 0.413            | 0.407            | 0.428            | 0.001            | 0.002            | 0.001            |                  |                  |                  | 60.46     | 62.53     | 61.36     |
|           | 0.8                      | 0.278            | 0.296            | 0.319            | 0.002            | 0.002            | 0.002            | 1.042            | 1.097            | 1.105            | 73.51     | 74.84     | 71.31     |
|           | 1                        | 0.174            | 0.207            | 0.202            | 0.002            | 0.002            | 0.003            |                  |                  |                  | 83.49     | 84.32     | 81.99     |
|           | 1.5                      | 0.117            | 0.104            | 0.105            | 0.003            | 0.003            | 0.002            |                  |                  |                  | 89.06     | 89.61     | 90.68     |
|           | 2                        | 0.11             | 0.094            | 0.093            | 0.003            | 0.004            | 0.003            |                  |                  |                  | 89.73     | 90.34     | 91.86     |
|           | 2.5                      | 0.093            | 0.087            | 0.091            | 0.004            | 0.005            | 0.004            |                  |                  |                  | 91.46     | 91.98     | 92.13     |
| Stage II  | 0.1                      | 0.821            | 0.814            | 0.804            | 0.001            | 0.001            | 0.001            |                  |                  |                  | 21.31     | 25.25     | 27.33     |
|           | 0.2                      | 0.753            | 0.739            | 0.73             | 0.001            | 0.001            | 0.001            |                  |                  |                  | 27.83     | 31.45     | 34.03     |
|           | 0.4                      | 0.614            | 0.598            | 0.582            | 0.001            | 0.003            | 0.001            |                  |                  |                  | 41.17     | 44.30     | 47.42     |
|           | 0.6                      | 0.482            | 0.473            | 0.469            | 0.001            | 0.002            | 0.001            |                  |                  |                  | 53.84     | 56.24     | 57.65     |
|           | 0.8                      | 0.378            | 0.37             | 0.363            | 0.001            | 0.002            | 0.002            | 1.042            | 1.097            | 1.105            | 63.82     | 65.72     | 67.33     |
|           | 1                        | 0.295            | 0.288            | 0.276            | 0.002            | 0.002            | 0.002            |                  |                  |                  | 71.88     | 73.29     | 75.20     |
|           | 1.5                      | 0.136            | 0.121            | 0.117            | 0.002            | 0.003            | 0.002            |                  |                  |                  | 87.14     | 87.88     | 89.59     |
|           | 2                        | 0.09             | 0.091            | 0.088            | 0.002            | 0.003            | 0.003            |                  |                  |                  | 91.55     | 92.07     | 92.31     |
|           | 2.5                      | 0.083            | 0.084            | 0.08             | 0.003            | 0.004            | 0.004            |                  |                  |                  | 92.32     | 92.80     | 93.12     |
| Stage III | 0.1                      | 0.749            | 0.757            | 0.744            | 0.000            | 0.000            | 0.001            | 1.042            | 1.097            | 1.105            | 28.12     | 31.72     | 32.76     |

|          |     |       |       |       |       |       |       |       |       |       |       |       |       |
|----------|-----|-------|-------|-------|-------|-------|-------|-------|-------|-------|-------|-------|-------|
|          | 0.2 | 0.678 | 0.663 | 0.656 | 0.000 | 0.000 | 0.001 |       |       |       | 34.93 | 38.20 | 40.72 |
|          | 0.4 | 0.549 | 0.548 | 0.569 | 0.001 | 0.001 | 0.001 |       |       |       | 47.41 | 50.05 | 48.60 |
|          | 0.6 | 0.443 | 0.427 | 0.445 | 0.002 | 0.002 | 0.002 |       |       |       | 57.68 | 59.80 | 59.91 |
|          | 0.8 | 0.343 | 0.368 | 0.362 | 0.002 | 0.002 | 0.002 |       |       |       | 67.27 | 68.92 | 67.42 |
|          | 1   | 0.247 | 0.282 | 0.235 | 0.003 | 0.004 | 0.003 |       |       |       | 76.58 | 77.85 | 79.00 |
|          | 1.5 | 0.114 | 0.194 | 0.095 | 0.004 | 0.005 | 0.005 |       |       |       | 89.44 | 90.06 | 91.86 |
|          | 2   | 0.089 | 0.101 | 0.085 | 0.006 | 0.006 | 0.005 |       |       |       | 92.03 | 92.43 | 92.76 |
|          | 2.5 | 0.083 | 0.084 | 0.076 | 0.008 | 0.008 | 0.007 |       |       |       | 92.80 | 93.16 | 93.76 |
| Stage IV | 0.1 | 0.781 | 0.777 | 0.764 | 0.003 | 0.003 | 0.003 |       |       |       | 25.34 | 29.08 | 31.13 |
|          | 0.2 | 0.643 | 0.643 | 0.623 | 0.006 | 0.006 | 0.007 |       |       |       | 38.87 | 41.93 | 44.25 |
|          | 0.4 | 0.365 | 0.376 | 0.386 | 0.013 | 0.014 | 0.013 |       |       |       | 66.22 | 68.00 | 66.24 |
|          | 0.6 | 0.203 | 0.218 | 0.165 | 0.022 | 0.021 | 0.021 |       |       |       | 82.63 | 83.41 | 86.97 |
|          | 0.8 | 0.184 | 0.216 | 0.157 | 0.028 | 0.028 | 0.028 | 1.042 | 1.097 | 1.105 | 85.03 | 85.78 | 88.33 |
|          | 1   | 0.181 | 0.194 | 0.156 | 0.033 | 0.034 | 0.034 |       |       |       | 85.80 | 86.60 | 88.96 |
|          | 1.5 | 0.178 | 0.189 | 0.15  | 0.051 | 0.052 | 0.052 |       |       |       | 87.81 | 88.51 | 91.13 |
|          | 2   | 0.191 | 0.202 | 0.154 | 0.068 | 0.071 | 0.065 |       |       |       | 88.20 | 89.06 | 91.95 |
|          | 2.5 | 0.202 | 0.218 | 0.163 | 0.085 | 0.088 | 0.083 |       |       |       | 88.77 | 89.61 | 92.76 |

A<sub>1</sub>: the absorbance value of the sample after reaction with DPPH; A<sub>2</sub>: the absorbance value of the sample after reaction with anhydrous ethanol; A<sub>3</sub>: The absorbance value after the reaction between DPPH and anhydrous ethanol; R: free radical clearance rate of DPPH.
